# Supplementary material for: Lewis acid–base bifunctional aluminum–salen catalysts: synthesis of cyclic carbonates from carbon dioxide and epoxides
Source: Royal Society of Chemistry journal article supplement (doi:10.1039/c5ra24596f), 2015-12-18
Supplement: c5ra24596f1.pdf [file c5ra24596f1.pdf]

## Supporting information:

### Lewis acid-base bifunctional aluminum-salen catalysts: synthesis of cyclic carbonates from carbon dioxide and epoxides

Yanwei Ren, Ou Jiang, Hang Zeng, Qiuping Mao and Huanfeng Jiang\*

*School of Chemistry and Chemical Engineering, South China University of  
Technology, Guangzhou 510640, China. Email: jianghf@scut.edu.cn*

#### Contents:

|                     |                                                                                                |    |
|---------------------|------------------------------------------------------------------------------------------------|----|
| 1. <b>Fig. S1.</b>  | $^1\text{H}$ and $^{13}\text{C}$ NMR spectra for ligand $\text{H}_2\text{L}^{\text{S1}}$ ..... | 2  |
| 2. <b>Fig. S2.</b>  | $^1\text{H}$ and $^{13}\text{C}$ NMR spectra for ligand $\text{H}_2\text{L}^{\text{S2}}$ ..... | 3  |
| 3. <b>Fig. S3.</b>  | $^1\text{H}$ and $^{13}\text{C}$ NMR spectra for <b>1a</b> .....                               | 4  |
| 4. <b>Fig. S4.</b>  | $^1\text{H}$ and $^{13}\text{C}$ NMR spectra for <b>1b</b> .....                               | 5  |
| 5. <b>Fig. S5.</b>  | $^1\text{H}$ and $^{13}\text{C}$ NMR spectra for salen ligand of <b>3a</b> .....               | 6  |
| 6. <b>Fig. S6.</b>  | $^1\text{H}$ and $^{13}\text{C}$ NMR spectra for salen ligand of <b>3b</b> .....               | 7  |
| 7. <b>Fig. S7</b>   | FT-IR spectrum of <b>1a</b> .....                                                              | 8  |
| 8. <b>Fig. S8</b>   | FT-IR spectrum of <b>1b</b> .....                                                              | 8  |
| 9. <b>Fig. S9</b>   | MS spectrum of ligand $\text{H}_2\text{L}^{\text{S1}}$ .....                                   | 9  |
| 10. <b>Fig. S10</b> | MS spectrum of ligand $\text{H}_2\text{L}^{\text{S2}}$ .....                                   | 9  |
| 11. <b>Fig. S11</b> | MS spectrum of <b>1a</b> .....                                                                 | 10 |
| 12. <b>Fig. S12</b> | MS spectrum of <b>1b</b> .....                                                                 | 10 |
| 13. <b>Fig. S13</b> | $^{27}\text{Al}$ NMR spectrum of <b>1a</b> .....                                               | 11 |
| 14. <b>Fig. S14</b> | $^{27}\text{Al}$ NMR spectrum of <b>1b</b> .....                                               | 11 |
| 15. <b>Fig. S15</b> | Recyclability and reusability of the catalyst <b>1b</b> .....                                  | 12 |

16. **Fig. S16** FT-IT spectra of **1b** (a) and the recovered **1b**.....12

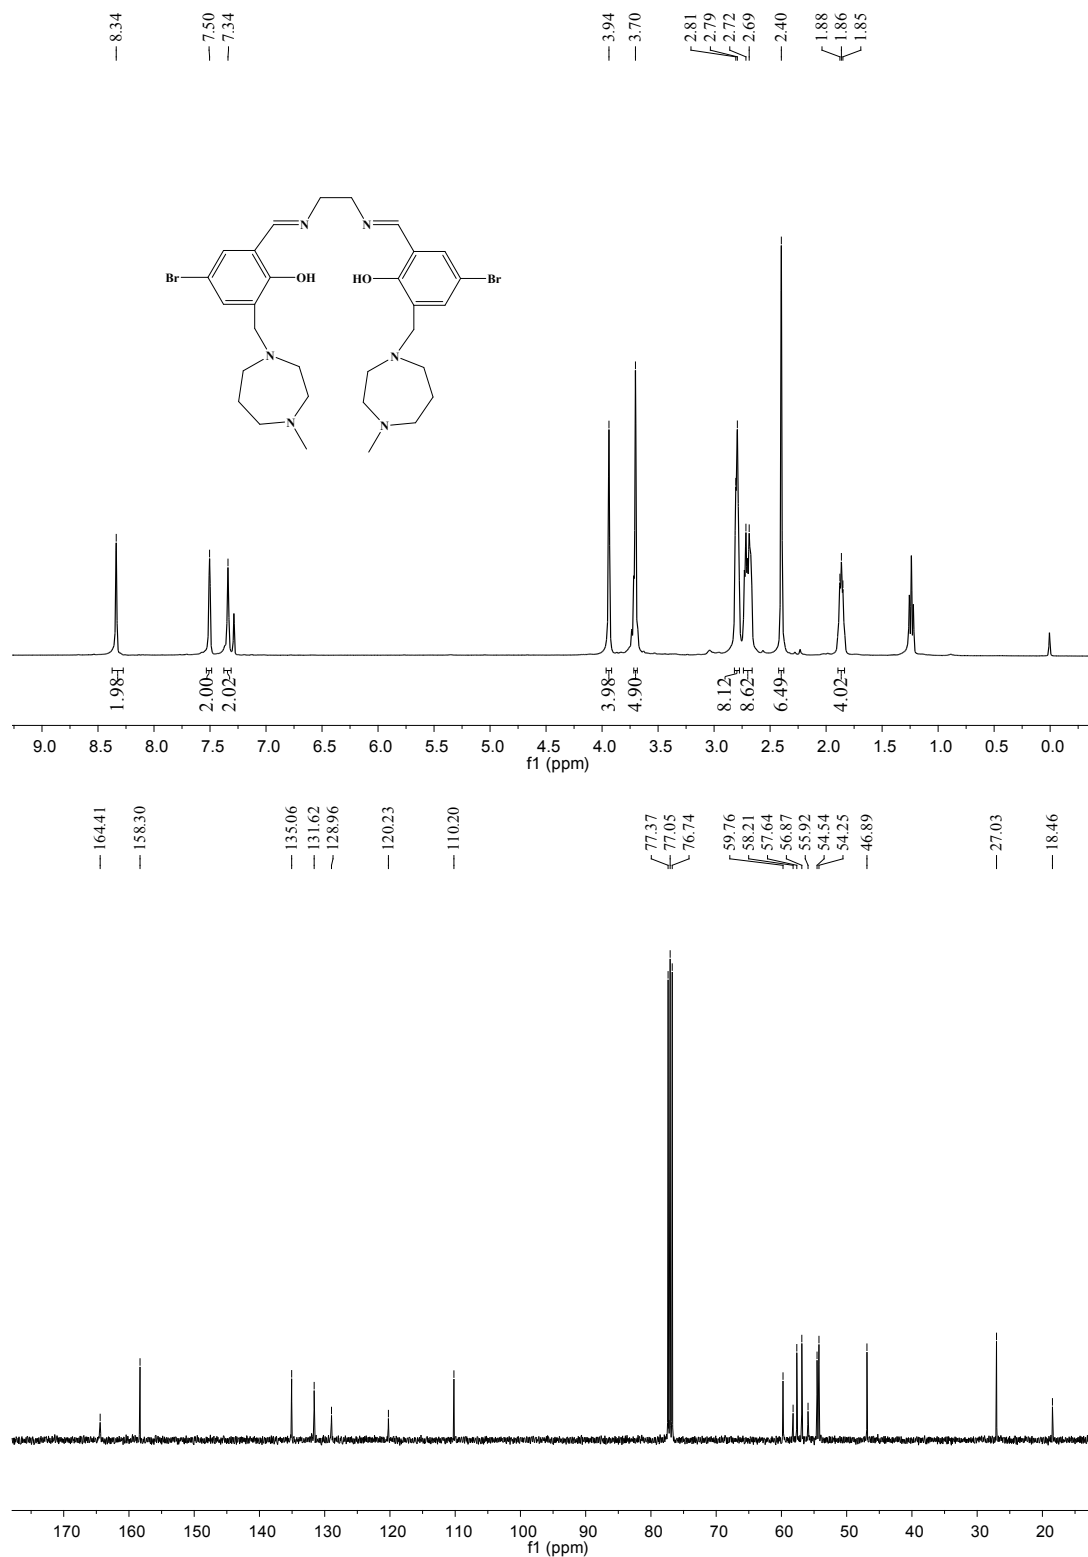

**Fig. S1.**  $^1H$  NMR and  $^{13}C$  NMR spectra ( $CDCl_3$ ) for ligand  $H_2L^{S1}$

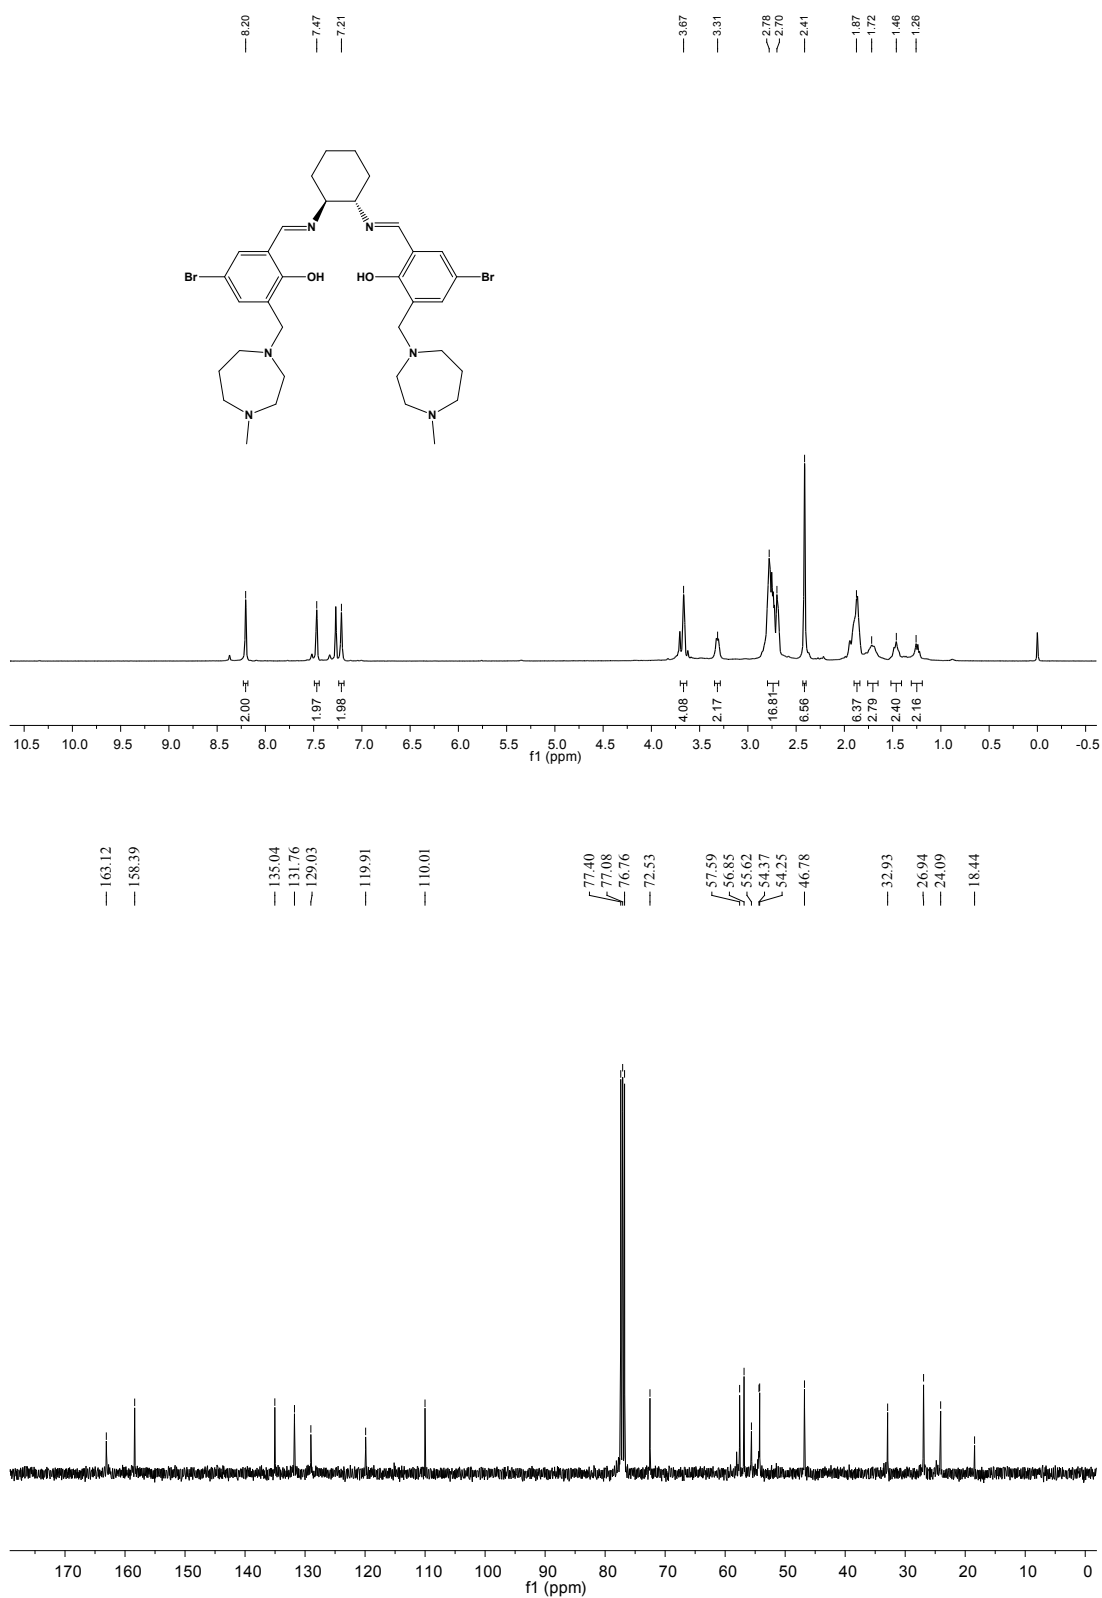

Fig. S2.  $^1H$  NMR and  $^{13}C$  NMR spectra ( $CDCl_3$ ) for ligand  $H_2L^2$

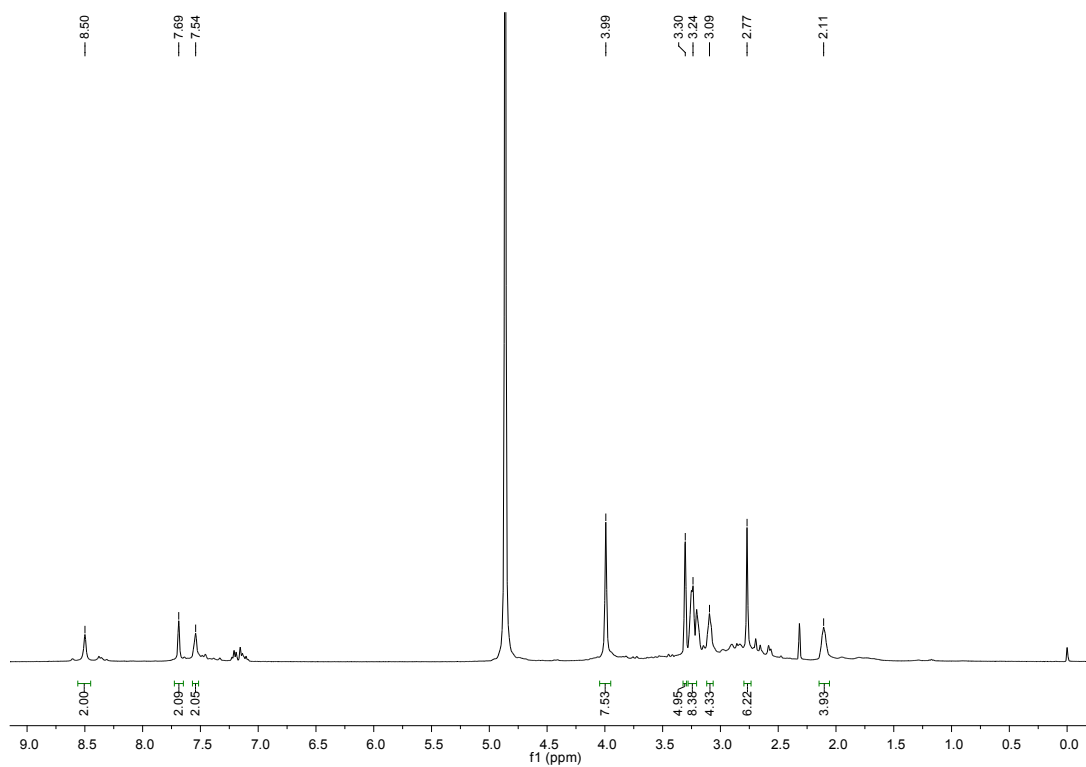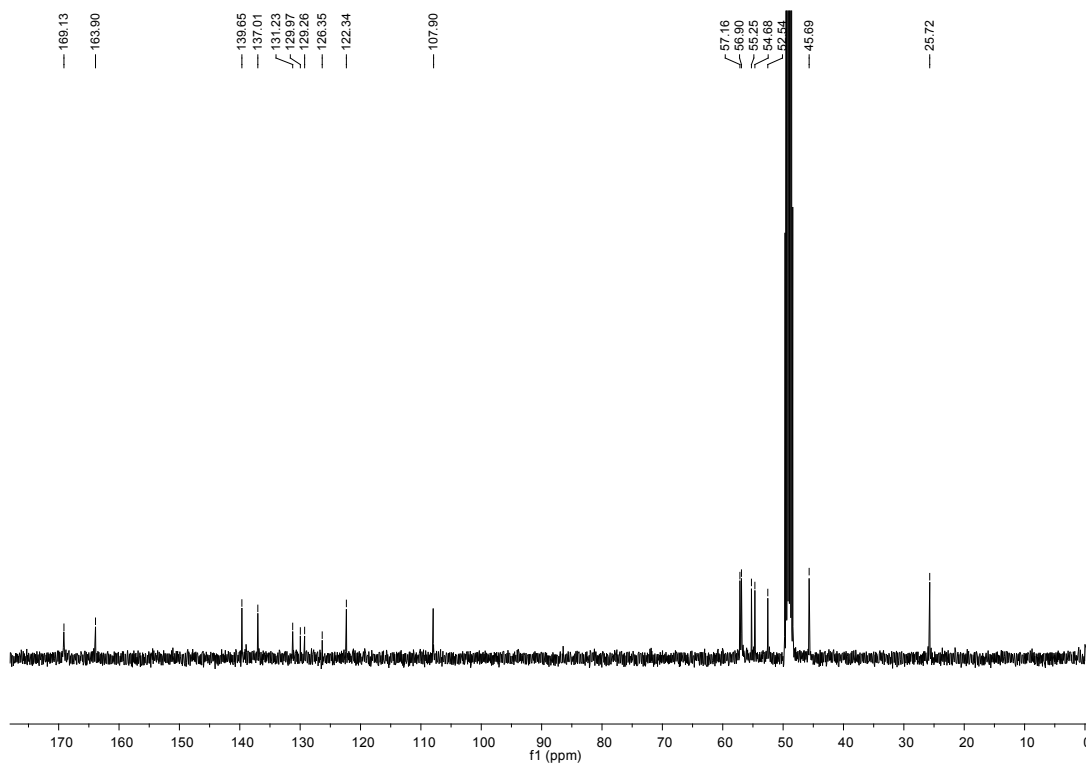

**Fig. S3.**  $^1\text{H}$  NMR and  $^{13}\text{C}$  NMR spectra ( $\text{CD}_3\text{OD}$ ) for **1a**

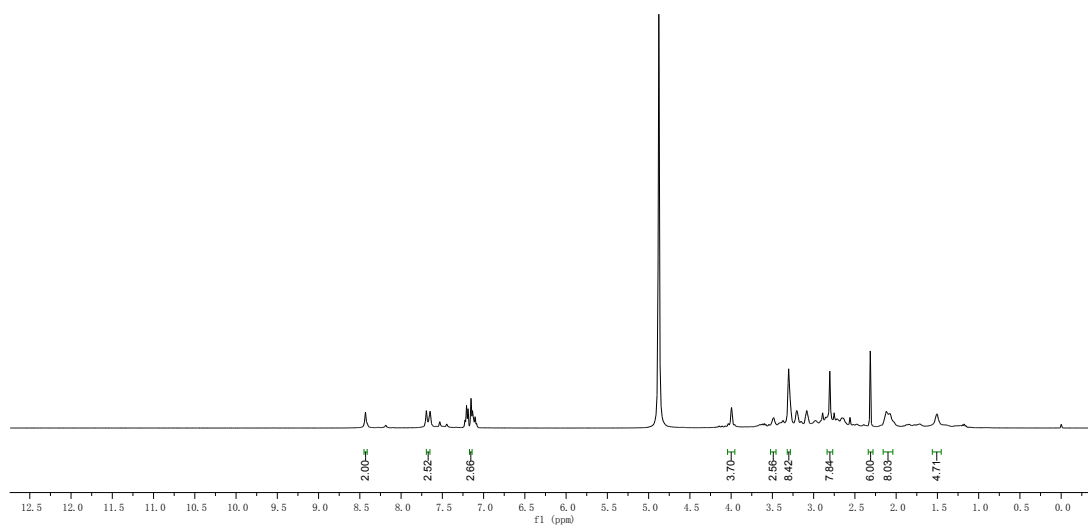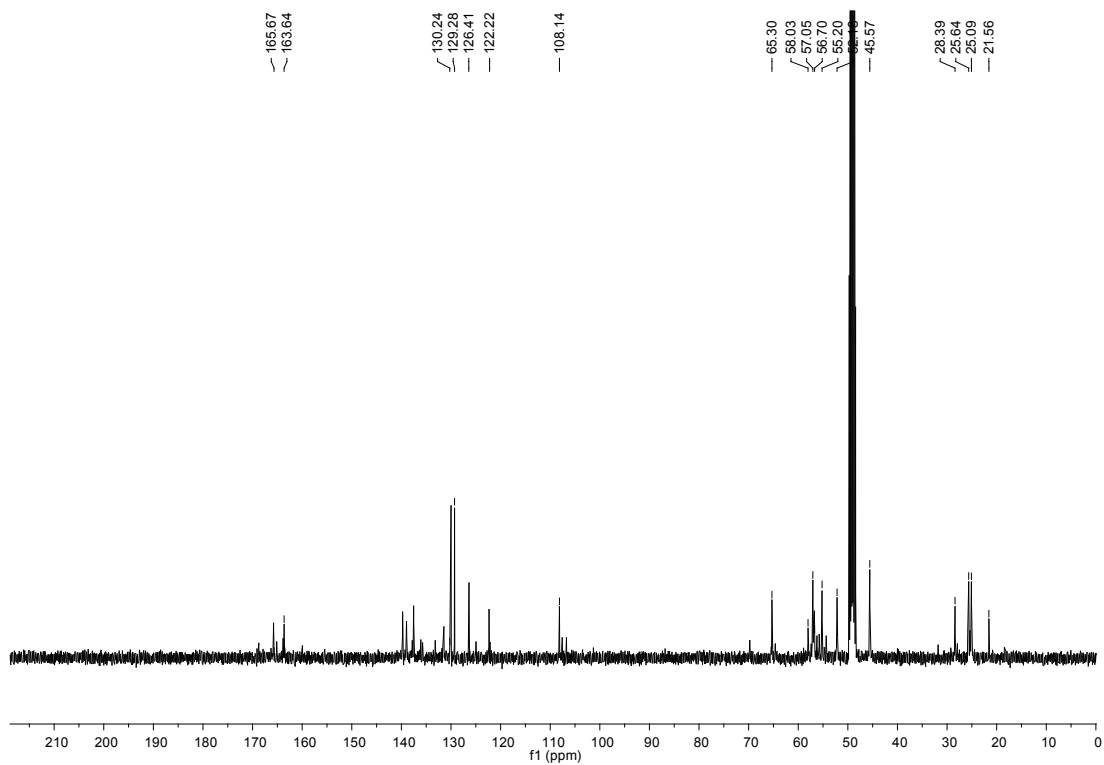

**Fig. S4.**  $^1\text{H}$  NMR and  $^{13}\text{C}$  NMR spectra (CD<sub>3</sub>OD) for **1b**

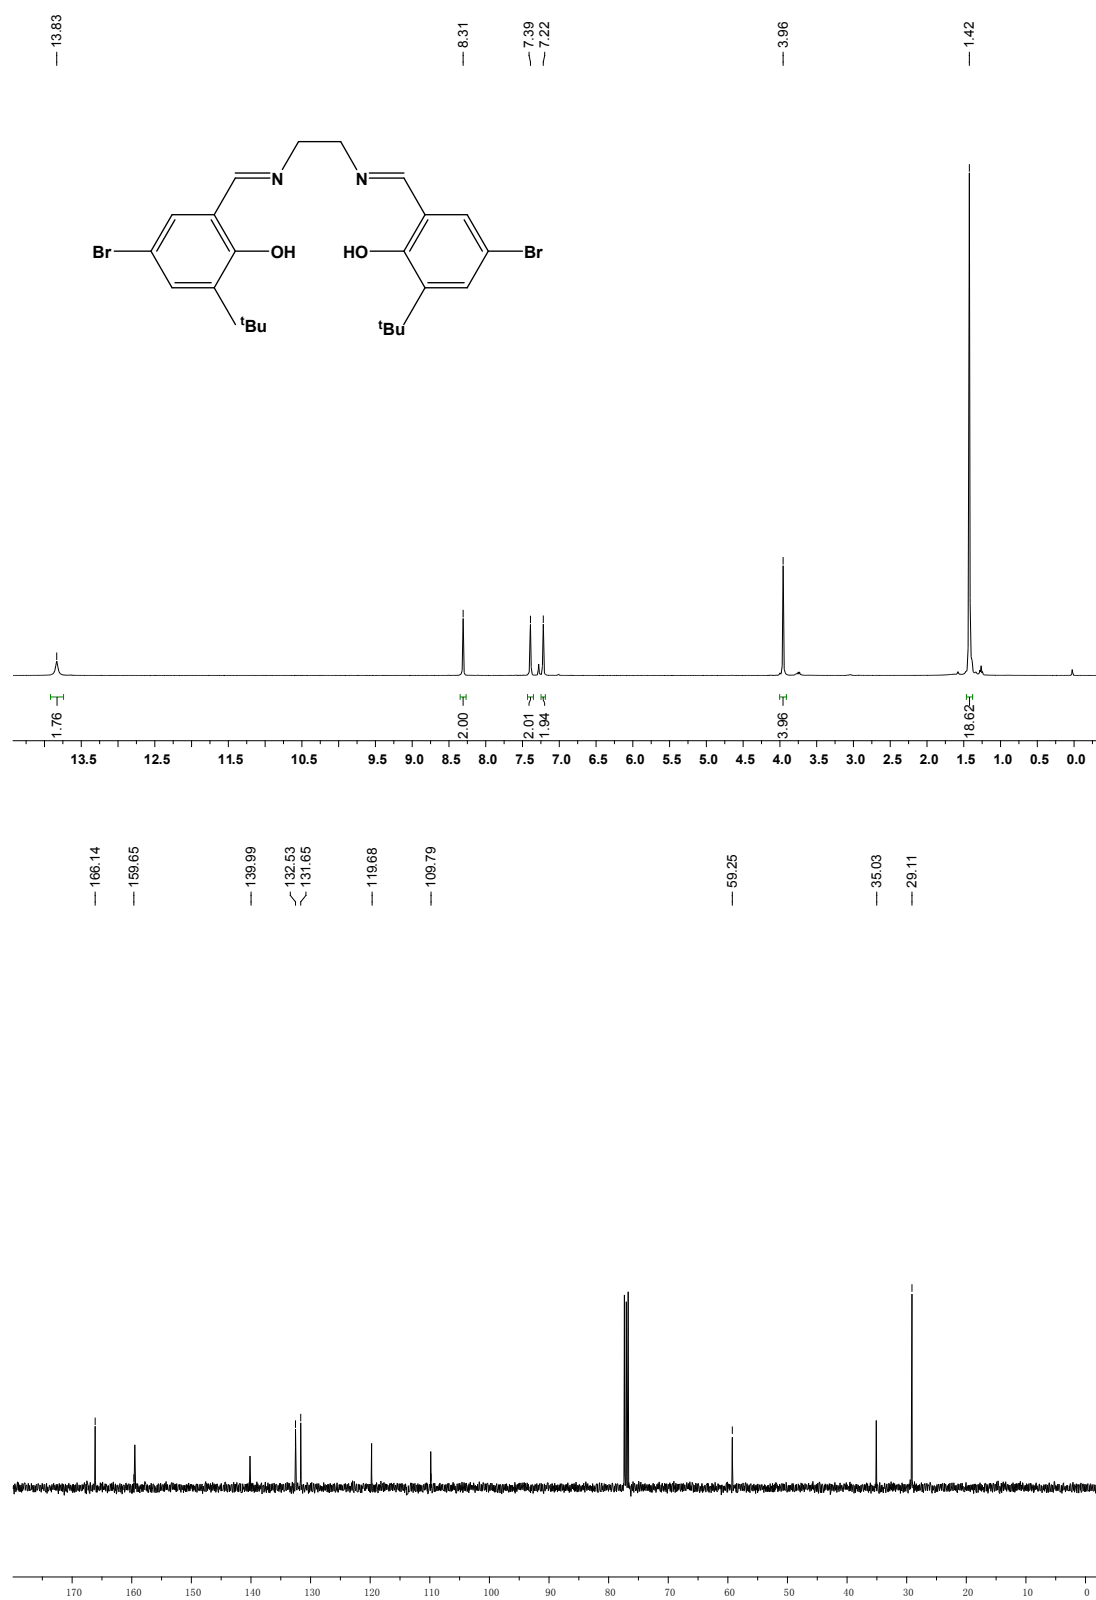

**Fig. S5.** <sup>1</sup>H NMR and <sup>13</sup>C NMR spectra (CDCl<sub>3</sub>) for salen ligand of **3a**

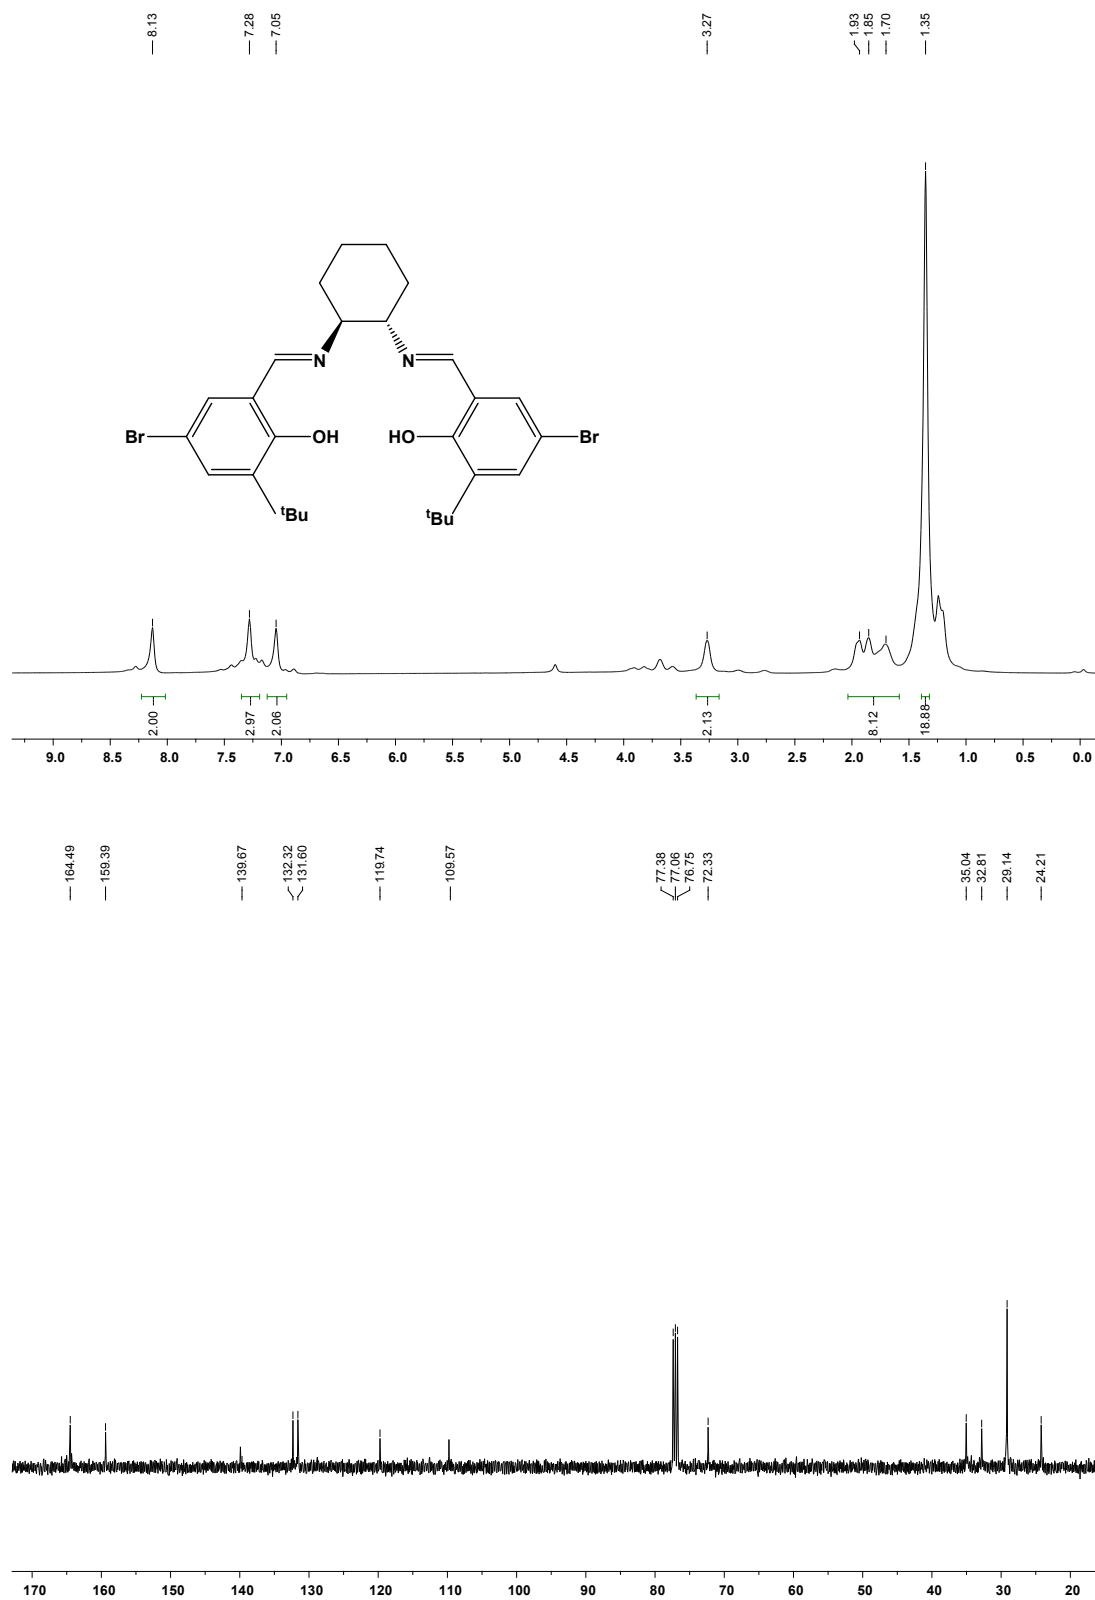

**Fig. S6.** <sup>1</sup>H NMR and <sup>13</sup>C NMR spectra (CDCl<sub>3</sub>) for salen ligand of **3b**

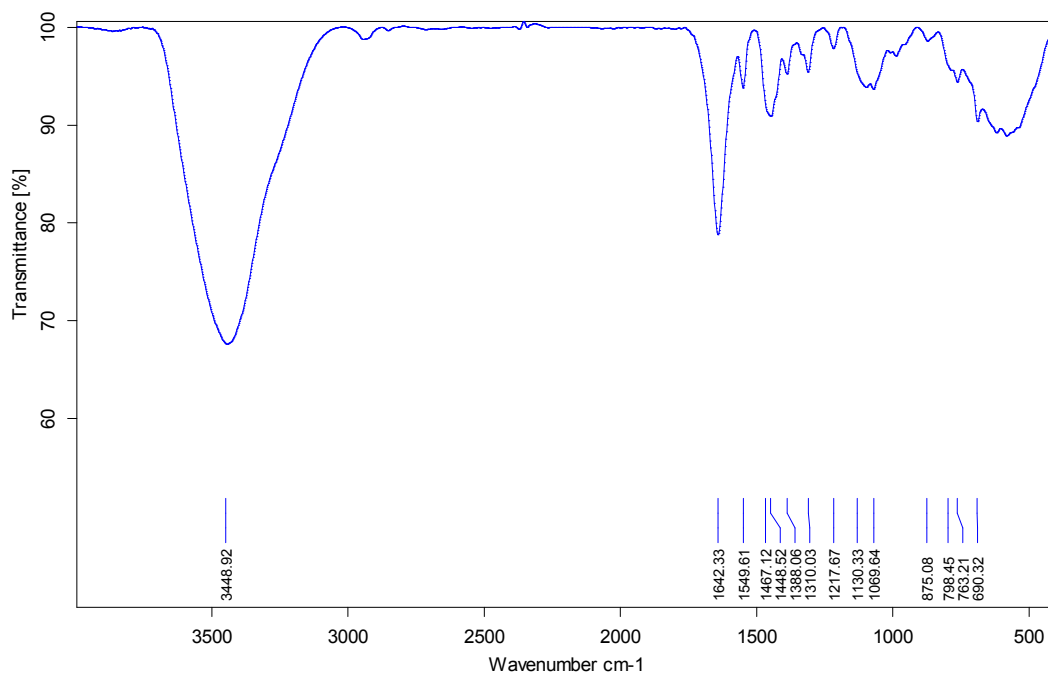

**Fig. S7** FT-IR spectrum of **1a**.

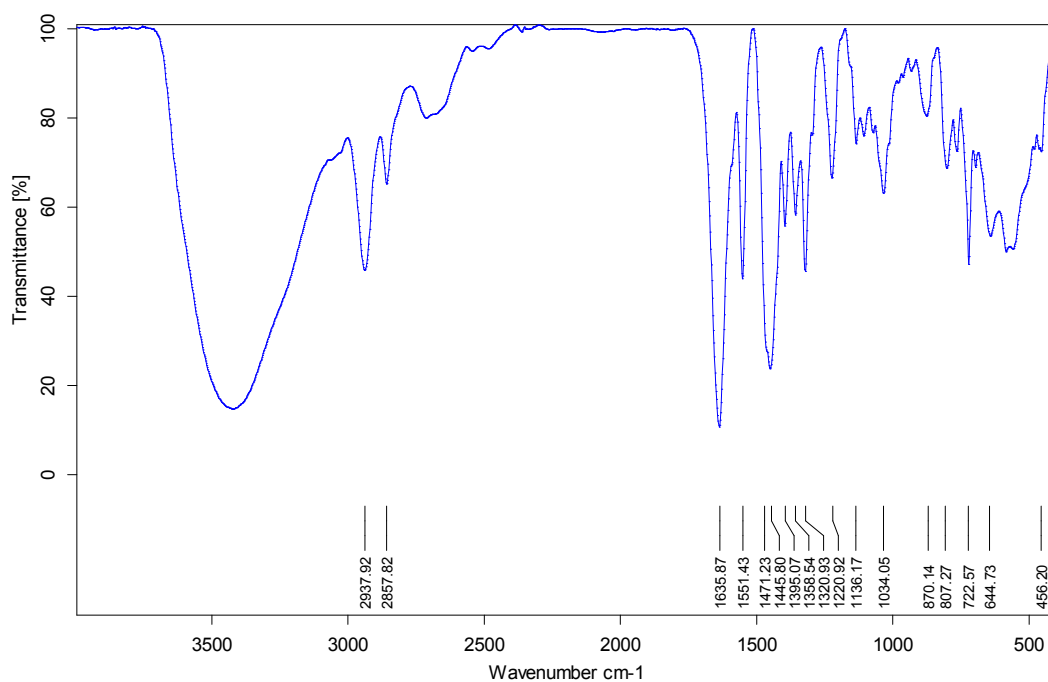

**Fig. S8** FT-IR spectrum of **1b**.



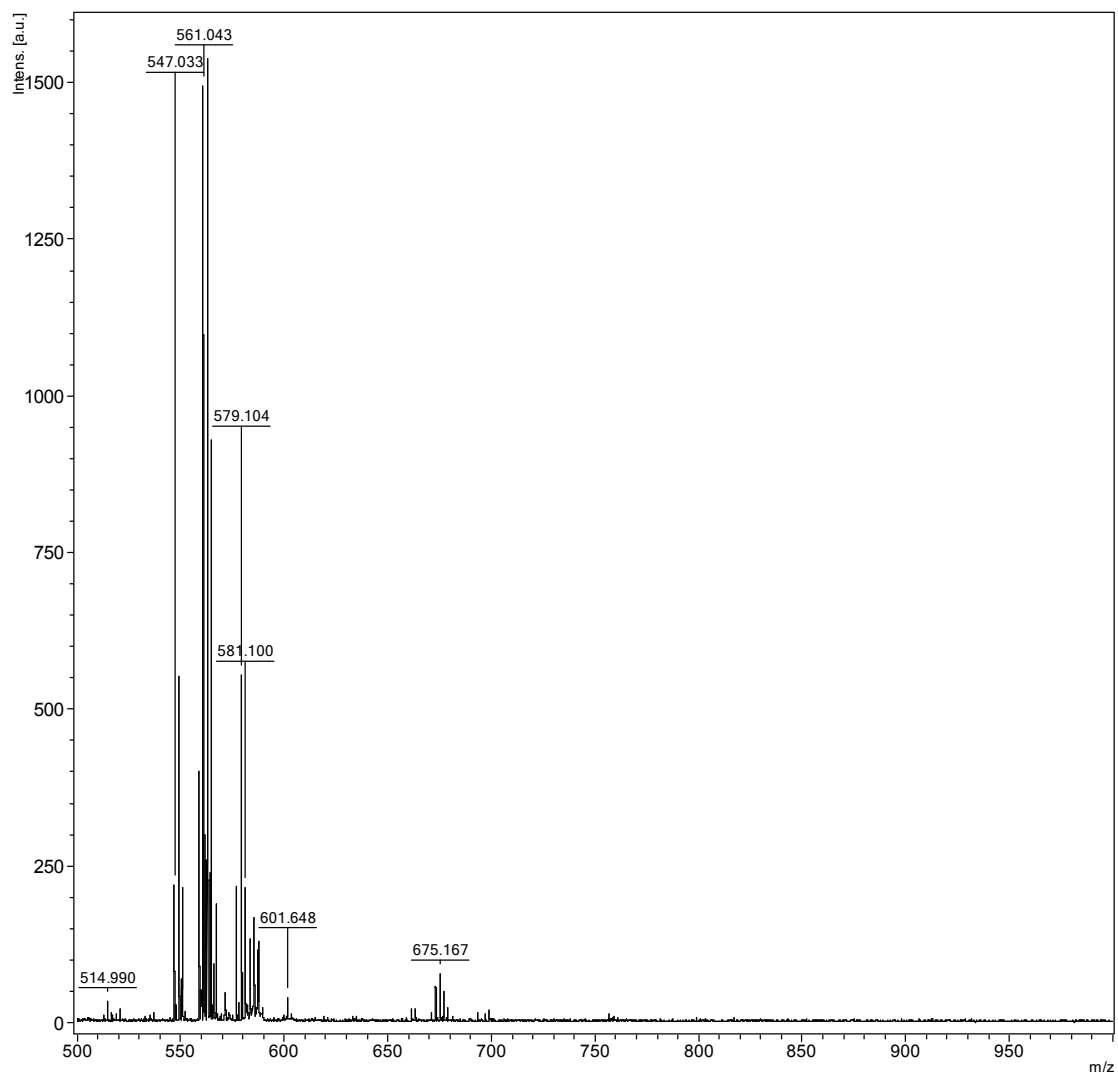

**Fig. S9** MS spectrum of ligand  $H_2L^{S1}$ .

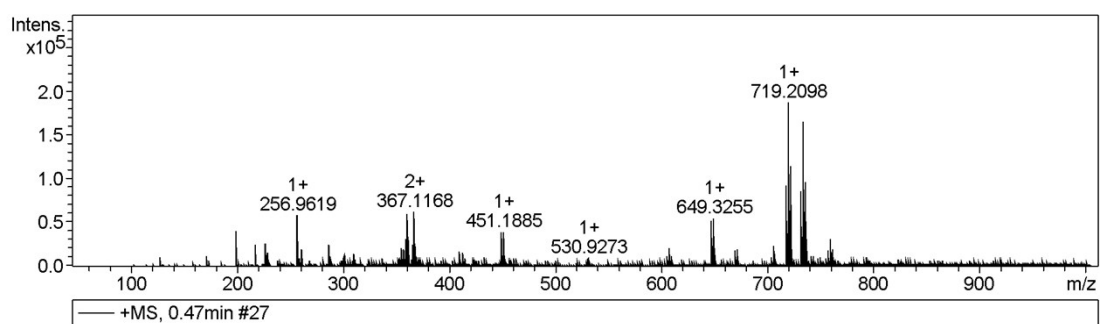

**Fig. S10** MS spectrum of ligand  $H_2L^{S2}$ .

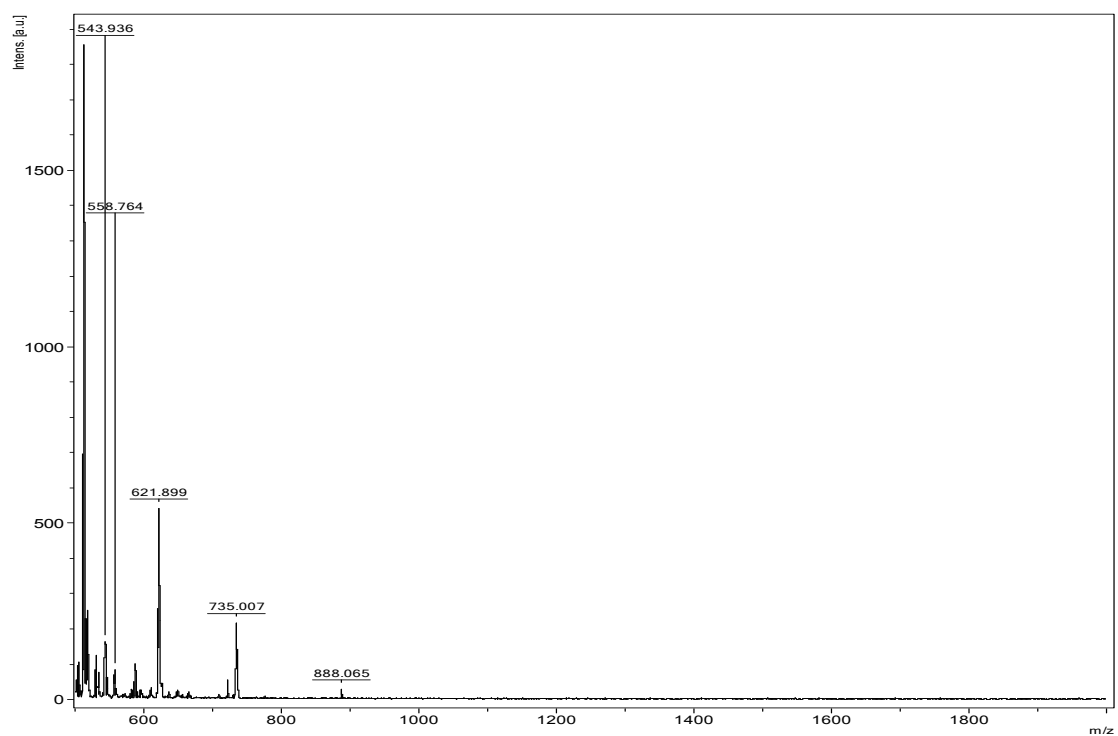

**Fig. S11** MS spectrum of **1a**.

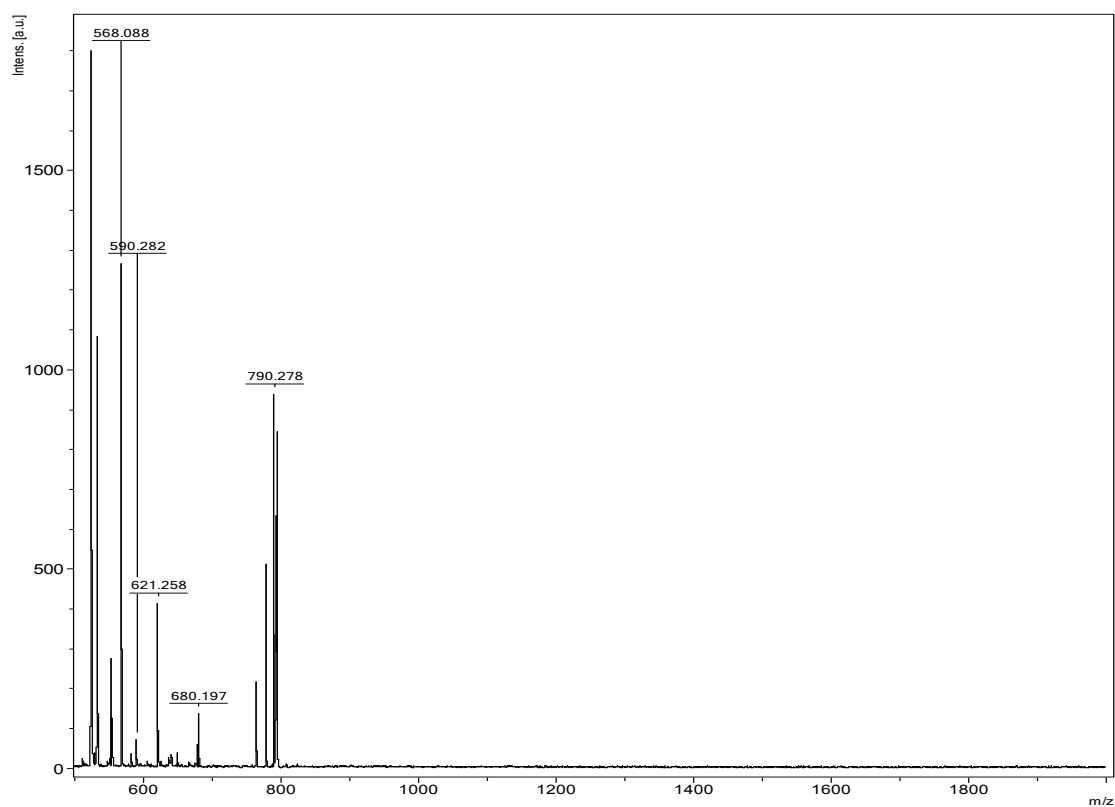

**Fig. S12** MS spectrum of **1b**.

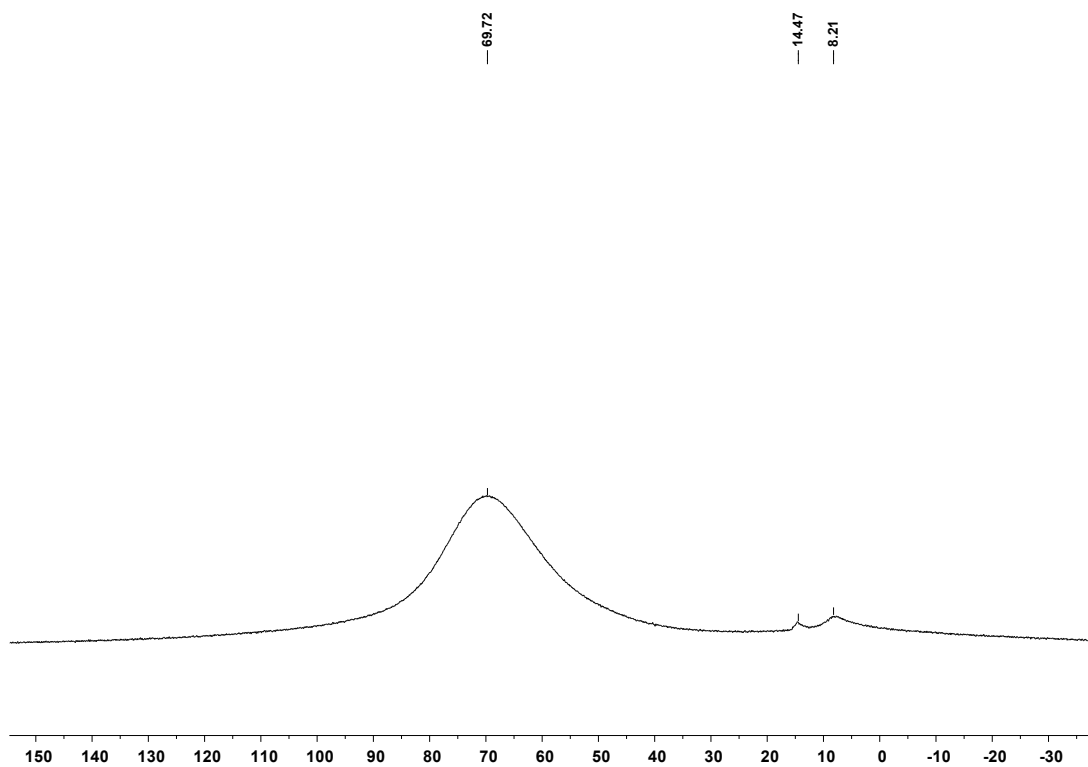

**Fig. S13**  $^{27}\text{Al}$  NMR spectrum of **1a**.

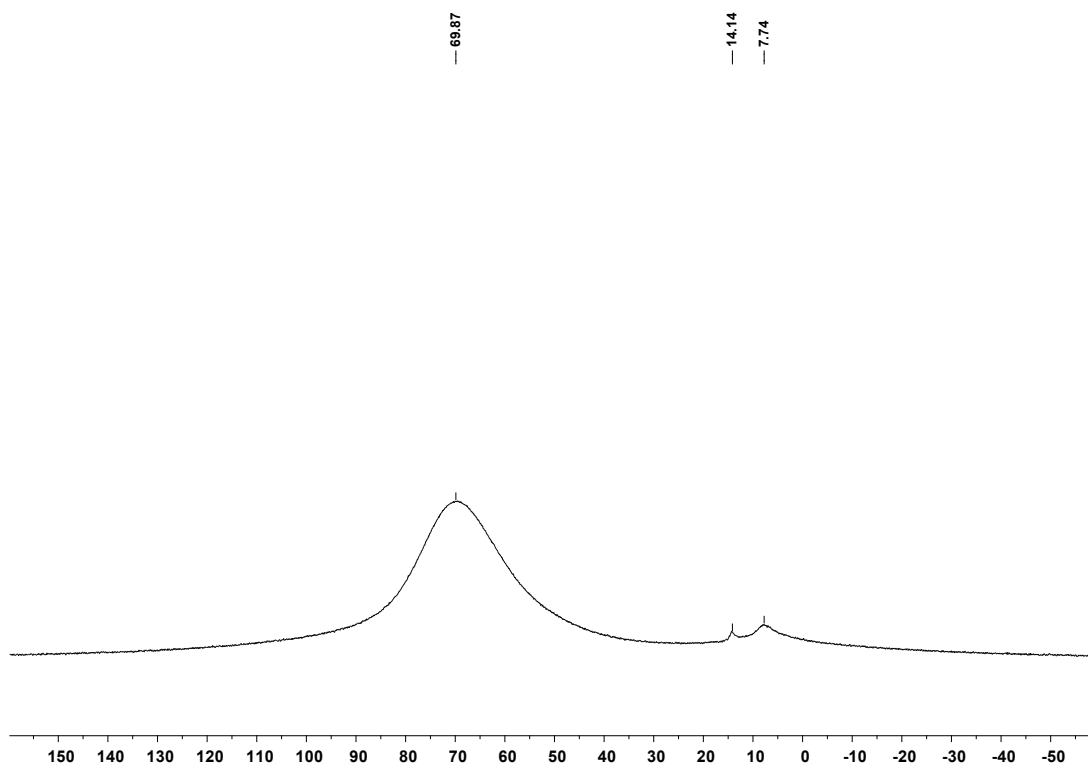

**Fig. S14**  $^{27}\text{Al}$  NMR spectrum of **1b**.

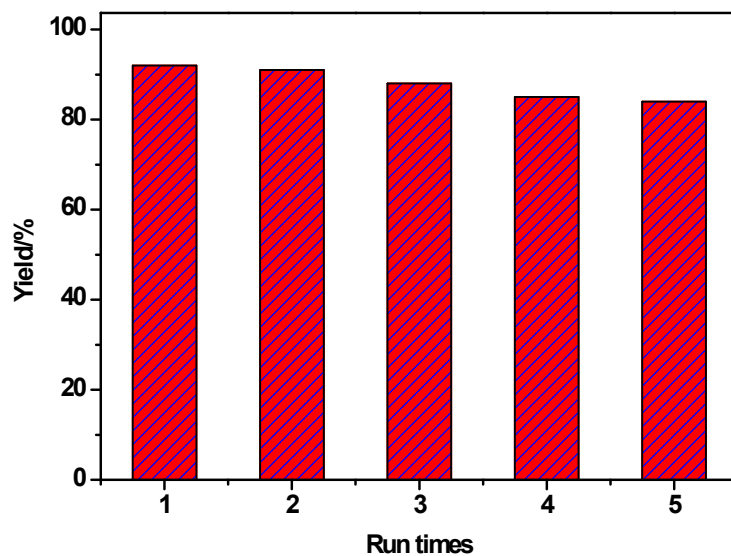

**Fig. S15** Recyclability and reusability of the catalyst **1b** in the coupling reaction of PO with CO<sub>2</sub>. Reaction conditions: 10 mmol PO with 1 mol% **1b**, CO<sub>2</sub> pressure 2 MPa, reaction time 4 h.

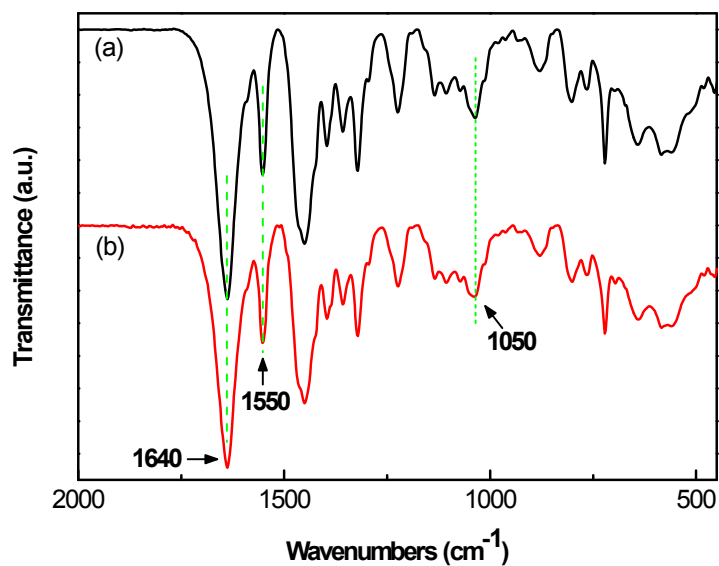

**Fig. S16** FT-IT spectra of **1b** (a) and the recovered **1b** after the 5th reuse in the coupling reaction of PO with CO<sub>2</sub> (b).
